# Supplementary material for: Cancer During Pregnancy: The Role of Vascular Toxicity in Chemotherapy-Induced Placental Toxicity
Source: PubMed Central journal article supplement (PMC7281110; doi:10.3390/cancers12051277), 2020-05-18
Supplement: cancers-12-01277-s001.pdf [file cancers-12-01277-s001.pdf]

**Table S1. Embryos and Placentae Weights**

| Control weights (grams) |    |        |          |         | DXR weights (grams) |         |        |          |       |
|-------------------------|----|--------|----------|---------|---------------------|---------|--------|----------|-------|
|                         |    | Embryo | Placenta | EPI     |                     |         | Embryo | Placenta | EPI   |
| <b>Mother 1</b>         | 1  | 1.46   | 0.0864   | 16.8981 | <b>Mother 1</b>     | 1       | 1.38   | 0.1165   | 11.85 |
|                         | 2  | 1.47   | 0.0964   | 15.2490 |                     | 2       | 1.35   | 0.085    | 15.88 |
|                         | 3  | 1.49   | 0.1104   | 13.4964 |                     | 3       | 1.28   | 0.1139   | 11.24 |
|                         | 4  | 1.54   | 0.1      | 15.4000 |                     | 4       | 1.4    | 0.1097   | 12.76 |
|                         | 5  | 1.58   | 0.1038   | 15.2216 |                     | 5       | 1.19   | 0.0916   | 12.99 |
|                         | 6  | 1.59   | 0.094    | 16.9149 |                     | 6       | 1.26   | 0.0928   | 13.58 |
|                         | 7  | 1.34   | 0.0786   | 17.0483 |                     | 7       | 1.29   | 0.1045   | 12.34 |
|                         | 8  | 1.28   | 0.0806   | 15.8809 |                     | 8       | 1.31   | 0.0976   | 13.42 |
|                         | 9  | 1.47   | 0.0984   | 14.9390 |                     | 9       | 1.18   | 0.0932   | 12.66 |
|                         | 10 | 1.51   | 0.097    | 15.5670 |                     | 10      | 1.23   | 0.1125   | 10.93 |
|                         | 11 | 1.54   | 0.1031   | 14.9370 |                     | 11      | 1.29   | 0.0721   | 17.89 |
|                         | 12 | 1.43   | 0.0955   | 14.9738 |                     | 12      | 1.16   | 0.1085   | 10.69 |
|                         |    | 13     | 1.42     | 0.0993  |                     | 14.3001 |        |          |       |
|                         |    |        |          |         |                     |         |        |          |       |
|                         |    |        |          |         | <b>Mother 2</b>     | 1       | 1.18   | 0.096    | 12.29 |
| <b>Mother 2</b>         | 1  | 1.2581 | 0.0821   | 15.324  |                     | 2       | 1.27   | 0.0838   | 15.16 |
|                         | 2  | 1.32   | 0.0936   | 14.1229 |                     | 3       | 1.2    | 0.0962   | 12.47 |
|                         | 3  | 1.31   | 0.085    | 15.3647 |                     | 4       | 1.16   | 0.0835   | 13.89 |
|                         | 4  | 1.36   | 0.0978   | 13.8855 |                     | 5       | 1.18   | 0.0756   | 15.61 |
|                         | 5  | 1.22   | 0.0723   | 16.8783 |                     | 6       | 1.19   | 0.0987   | 12.06 |
|                         | 6  | 1.33   | 0.0914   | 14.5810 |                     | 7       | 1.23   | 0.0877   | 14.03 |
|                         | 7  | 1.33   | 0.1067   | 12.4555 |                     | 8       | 1.3    | 0.0974   | 13.35 |
|                         | 8  | 1.34   | 0.089    | 15.0449 |                     | 9       | 1.24   | 0.092    | 13.48 |
|                         | 9  | 1.22   | 0.0798   | 15.3321 |                     | 10      | 1.28   | 0.08     | 16.00 |

|                 |        |        |          |         |                 |                 |        |        |        |       |
|-----------------|--------|--------|----------|---------|-----------------|-----------------|--------|--------|--------|-------|
|                 | 10     | 1.31   | 0.0974   | 13.4887 |                 | 11              | 1.21   | 0.0779 | 15.53  |       |
|                 | 11     | 1.36   | 0.0987   | 13.7923 |                 | 12              | 1.17   | 0.1123 | 10.42  |       |
|                 | 12     | 1.38   | 0.0742   | 18.6388 |                 |                 |        |        |        |       |
|                 | 13     | 1.28   | 0.1035   | 12.4145 |                 | <b>Mother 3</b> | 1      | 1.5803 | 0.1173 | 13.47 |
|                 | 14     | 1.32   | 0.1082   | 12.2440 |                 |                 | 2      | 1.2839 | 0.0968 | 13.26 |
|                 |        |        |          | 3       | 1.5382          |                 | 0.108  | 14.24  |        |       |
| <b>Mother 3</b> | 1      | 1.17   | 0.1228   | 9.5195  | 4               |                 | 1.5047 | 0.1043 | 14.43  |       |
|                 | 2      | 1.36   | 0.1108   | 12.2292 | 5               |                 | 1.524  | 0.1225 | 12.44  |       |
|                 | 3      | 1.40   | 0.106    | 13.1849 | 6               | 1.4794          | 0.095  | 15.57  |        |       |
|                 | 4      | 1.41   | 0.0915   | 15.4568 |                 |                 |        |        |        |       |
|                 | 5      | 1.32   | 0.1082   | 12.1738 | <b>Mother 4</b> | 1               | 0.9003 | 0.081  | 11.11  |       |
| 6               | 1.26   | 0.0967 | 13.0362  | 2       |                 | 0.9938          | 0.1126 | 8.83   |        |       |
| 7               | 1.30   | 0.1186 | 10.9941  | 3       |                 | 0.8571          | 0.108  | 7.94   |        |       |
| 8               | 1.3667 | 0.1108 | 12.33484 | 4       |                 | 0.7787          | 0.0718 | 10.85  |        |       |
|                 |        |        |          | 5       |                 | 0.9911          | 0.0909 | 10.90  |        |       |
| <b>Mother 4</b> | 1      | 1.09   | 0.0891   | 12.2492 | 6               | 1.1009          | 0.0881 | 12.50  |        |       |
|                 | 2      | 1.18   | 0.0955   | 12.4042 | 7               | 0.9081          | 0.0944 | 9.62   |        |       |
|                 | 3      | 1.06   | 0.081    | 13.0370 | 8               | 0.8868          | 0.1054 | 8.41   |        |       |
|                 | 4      | 1.18   | 0.1041   | 11.3112 | 9               | 0.9781          | 0.1046 | 9.35   |        |       |
|                 | 5      | 1.09   | 0.0918   | 11.8464 | 10              | 1.0122          | 0.131  | 7.73   |        |       |
|                 |        |        |          |         |                 |                 |        |        |        |       |
| <b>Mother 4</b> | 6      | 1.24   | 0.0908   | 13.6696 | <b>Mother 5</b> | 1               | 1.0154 | 0.0741 | 13.70  |       |
|                 | 7      | 1.09   | 0.0893   | 12.1881 |                 | 2               | 1.024  | 0.0978 | 10.47  |       |
|                 | 8      | 1.08   | 0.0957   | 11.3271 |                 | 3               | 0.967  | 0.0855 | 11.31  |       |
|                 | 9      | 1.07   | 0.0965   | 11.1337 |                 | 4               | 0.0883 | 0.1011 | 0.87   |       |
|                 | 10     | 1.14   | 0.0932   | 12.2146 |                 | 5               | 0.9976 | 0.0841 | 11.86  |       |
| 11              | 1.14   | 0.0902 | 12.6086  |         |                 |                 |        |        |        |       |

|                 |    |        |        |          |  |   |        |        |       |
|-----------------|----|--------|--------|----------|--|---|--------|--------|-------|
|                 | 12 | 1.15   | 0.0813 | 14.0898  |  | 6 | 1.0278 | 0.0906 | 11.34 |
|                 | 13 | 0.94   | 0.0714 | 13.1989  |  | 7 | 0.852  | 0.0849 | 10.04 |
|                 | 14 | 1.16   | 0.099  | 11.7576  |  | 8 | 0.9738 | 0.0742 | 13.12 |
|                 | 15 | 1.19   | 0.0961 | 12.3725  |  | 9 | 1.0779 | 0.0713 | 15.12 |
|                 | 16 | 1.21   | 0.1212 | 9.9670   |  |   |        |        |       |
|                 |    |        |        |          |  |   |        |        |       |
| <b>Mother 5</b> | 1  | 1.1576 | 0.0765 | 15.13203 |  |   |        |        |       |
|                 | 2  | 1.1544 | 0.0822 | 14.0438  |  |   |        |        |       |
|                 | 3  | 1.0743 | 0.096  | 11.19063 |  |   |        |        |       |
|                 | 4  | 1.0262 | 0.0882 | 11.63492 |  |   |        |        |       |
|                 | 5  | 1.1332 | 0.1006 | 11.26441 |  |   |        |        |       |
|                 | 6  | 1.1702 | 0.0893 | 13.10414 |  |   |        |        |       |
|                 | 7  | 1.1175 | 0.106  | 10.54245 |  |   |        |        |       |
|                 | 8  | 1.1937 | 0.0896 | 13.32254 |  |   |        |        |       |
|                 | 9  | 1.1937 | 0.0947 | 12.60507 |  |   |        |        |       |
|                 | 10 | 1.0739 | 0.1072 | 10.01772 |  |   |        |        |       |

**Table S2. Proteins exhibiting significant change in their expression upon exposure to DXR**

| Protein ID                                                                   | Protein Names                                                                                                     | Gene Name           | Ratio of protein expression in DXR treated placenta vs. Control placenta | P Value  |
|------------------------------------------------------------------------------|-------------------------------------------------------------------------------------------------------------------|---------------------|--------------------------------------------------------------------------|----------|
| G5E893                                                                       |                                                                                                                   | Ankrd12             | 1.324771217                                                              | 0        |
| P35285;A2ARZ7                                                                | Ras-related protein Rab-22A                                                                                       | Rab22a              | 1.103485874                                                              | 0        |
| P28666                                                                       | Murinoglobulin-2                                                                                                  | Mug2                | 1.079858738                                                              | 0        |
| Q9EQI5                                                                       |                                                                                                                   | Ppbp                | 1.079301188                                                              | 0        |
| Q61646                                                                       | Haptoglobin;Haptoglobin alpha chain;Haptoglobin beta chain                                                        | Hp                  | 1.066084752                                                              | 0        |
| A0A1W2P8C6;P41731                                                            | CD63 antigen                                                                                                      | Cd63                | 1.064040441                                                              | 0        |
| P18406                                                                       | Protein CYR61                                                                                                     | Cyr61               | 1.055193051                                                              | 1.54E-12 |
| Q80ZS9;Q08535;A0A1B0GS37                                                     | Secretin                                                                                                          | Sct                 | 1.046771605                                                              | 4.54E-09 |
| P52430;H3BK03;H3BLB8                                                         | Serum paraoxonase/arylesterase 1                                                                                  | Pon1                | 1.046478354                                                              | 5.79E-09 |
| E9Q6C2;Q8CG14                                                                | Complement C1s-A subcomponent;Complement C1s-A subcomponent heavy chain;Complement C1s-A subcomponent light chain | C1s1;C1sa           | 1.046150139                                                              | 7.30E-09 |
| Q62313;Q62314                                                                | Trans-Golgi network integral membrane protein 1;Trans-Golgi network integral membrane protein 2                   | Tgoln1;Tgoln2       | 1.04510771                                                               | 1.81E-08 |
| Q60590;P07361                                                                | Alpha-1-acid glycoprotein 1                                                                                       | Orm1                | 1.044140673                                                              | 4.14E-08 |
| A0A0A6YYE7;A0A0B4J1I9;A0A0B4J1I4;A0A0B4J1I3;A0A0A6YYE5;A0A075B5M4;A0A075B5L8 |                                                                                                                   | Igkv4-57-1;Igkv4-79 | 1.044012524                                                              | 4.53E-08 |
| Q921H9                                                                       | Cytochrome c oxidase assembly factor 7                                                                            | Coa7                | 1.043920998                                                              | 4.81E-08 |

|                                                               |                                                                                                           |               |             |             |
|---------------------------------------------------------------|-----------------------------------------------------------------------------------------------------------|---------------|-------------|-------------|
| A0A0R4J182;Q9JL96;A0A286YE81;A0A286YCC4                       | Cathepsin M                                                                                               | Ctsm          | 1.043513648 | 6.70E-08    |
| D3Z4L9;Q61333                                                 | Tumor necrosis factor alpha-induced protein 2                                                             | Tnfaip2       | 1.041257583 | 4.19E-07    |
| E0CYQ4;E0CX64;H3BK26;P49442                                   | Inositol polyphosphate 1-phosphatase                                                                      | Inpp1         | 1.038369088 | 3.28E-06    |
| Q91Y97                                                        | Fructose-bisphosphate aldolase B                                                                          | Aldob         | 1.037879259 | 4.56E-06    |
| A0A075B5P5;A0A1Y7VJN6;P03987                                  | Ig gamma-3 chain C region                                                                                 | Ighg3         | 1.03783164  | 4.67E-06    |
| Q3UDS7;A0A1L1SSF2;Q8VDL4                                      | ADP-dependent glucokinase                                                                                 | Adpgk         | 1.03752025  | 5.82E-06    |
| P56380                                                        | Bis(5-nucleosyl)-tetrphosphatase [asymmetrical]                                                           | Nudt2         | 1.037408954 | 6.16E-06    |
| A0A075B5P3;A0A0A6YVP0                                         |                                                                                                           | Ighg2b        | 1.037127328 | 7.40E-06    |
| P13366;Q920S1                                                 | Granzyme G                                                                                                | Gzmg          | 1.036033943 | 1.53E-05    |
| A0A0R4J0G0;Q8BH04;Q9Z2V4                                      | Phosphoenolpyruvate carboxykinase [GTP], mitochondrial;Phosphoenolpyruvate carboxykinase, cytosolic [GTP] | Pck2;Pck1     | 1.034708415 | 3.82E-05    |
| P21300                                                        | Aldose reductase-related protein 1                                                                        | Akr1b7        | 1.034606934 | 4.05E-05    |
| Q91VK1;A0A1Y7VM24;A0A1Y7VM47;A0A1Y7VIU9;A0A1Y7VKZ4;A0A1Y7VJ43 | Basic leucine zipper and W2 domain-containing protein 2                                                   | Bzw2          | 1.034355438 | 4.69E-05    |
| F8VQ42;E0CZ72;P28740                                          | Kinesin-like protein KIF2A                                                                                | Kif2a         | 1.034349308 | 4.69E-05    |
| A0A0R4J1V1;Q75N73;D3Z6P5;D3Z354;D3YXD7                        | Zinc transporter ZIP14                                                                                    | Slc39a14      | 1.034109612 | 5.35E-05    |
| Q80XD8                                                        | Proline-rich acidic protein 1                                                                             | Prap1         | 1.033760948 | 6.53E-05    |
| Q6P5D8                                                        | Structural maintenance of chromosomes flexible hinge domain-containing protein 1                          | Smchd1        | 1.033568202 | 7.29E-05    |
| Q91XL1                                                        |                                                                                                           | Lrg1          | 1.033502974 | 7.47E-05    |
| Q8WUR0;J3QPY0;A0A0U1RNT4                                      | Protein C19orf12 homolog                                                                                  | 1600014C10Rik | 1.033291254 | 8.31E-05    |
| A0A087WRL8;B8JK81;Q3TP05;B8JK87;Q8K371                        | Angiotenin-like protein 2                                                                                 | Amotl2        | 1.03206227  | 0.000182951 |
| Q9CR95                                                        | Adaptin ear-binding coat-associated protein 1                                                             | Necap1        | 1.031886454 | 0.000203346 |
| Q9Z0G0                                                        | PDZ domain-containing protein GIPC1                                                                       | Gipc1         | 1.031777137 | 0.000214386 |

|                                                                           |                                                                                               |               |             |             |
|---------------------------------------------------------------------------|-----------------------------------------------------------------------------------------------|---------------|-------------|-------------|
| Q8R3H7                                                                    | Heparan sulfate 2-O-sulfotransferase 1                                                        | Hs2st1        | 1.031323779 | 0.000277215 |
| P70274;E0CZC5;E0CZ76;E0CX80                                               | Selenoprotein P                                                                               | Sepp1         | 1.031071883 | 0.000317481 |
| O70238                                                                    |                                                                                               | Rhox6         | 1.030939557 | 0.000339585 |
| Q9QZ25                                                                    | Vascular non-inflammatory molecule 3                                                          | Vnn3          | 1.030512429 | 0.000430303 |
| Q8BGS2                                                                    | Bola-like protein 2                                                                           | Bola2         | 1.030092444 | 0.000533251 |
| Q8CIG8;A0A0R4J049;F6QQQ6                                                  | Protein arginine N-methyltransferase 5                                                        | Prmt5         | 1.029727139 | 0.000638401 |
| Q9DBB9                                                                    | Carboxypeptidase N subunit 2                                                                  | Cpn2          | 1.029462851 | 0.000739422 |
| Q8VDP3;E9PUI4                                                             | Protein-methionine sulfoxide oxidase MICAL1                                                   | Mical1        | 1.029407866 | 0.000759045 |
| P08884                                                                    | Granzyme E                                                                                    | Gzme          | 1.028857195 | 0.001007017 |
| E9PUW7;Q9EPK7                                                             | Exportin-7                                                                                    | Xpo7          | 1.028602264 | 0.001148492 |
| O89016;A0A1Y7VMF7                                                         | ATP-binding cassette sub-family D member 4                                                    | Abcd4         | 1.027986204 | 0.001617278 |
| A0A1W2P766                                                                |                                                                                               |               | 1.027153391 | 0.002543768 |
| E9Q3G8;A0A286YCP2                                                         |                                                                                               | Nup153        | 1.026752483 | 0.00312882  |
| F6XCT0                                                                    |                                                                                               | Macf1         | 1.026442435 | 0.003650235 |
| E9Q5W5;A0A140LJ04;Q5SSH7                                                  | Zinc finger ZZ-type and EF-hand domain-containing protein 1                                   | Zzef1         | 1.026139273 | 0.004210954 |
| S4R2D5;A0A0A0MQN4;Q9D906;S4R2T5;S4R2P7;S4R1T0;S4R1K1;S4R1U3;S4R1W9;S4R1N8 | Ubiquitin-like modifier-activating enzyme ATG7                                                | Atg7          | 1.025959811 | 0.004618129 |
| Q8BZA9;A0A0J9YV11                                                         | Fructose-2,6-bisphosphatase TIGAR                                                             | Tigar         | 1.025796999 | 0.004956989 |
| P62046                                                                    | Leucine-rich repeat and calponin homology domain-containing protein 1                         | Lrch1         | 1.025357888 | 0.006066764 |
| Q3U816;Q9Z2G9                                                             | Oxidoreductase HTATIP2                                                                        | Htatip2       | 1.025298291 | 0.006192569 |
| Q9QXE7;A0A0J9YV90;Q8BHJ5                                                  | F-box-like/WD repeat-containing protein TBL1X;F-box-like/WD repeat-containing protein TBL1XR1 | Tbl1x;Tbl1xr1 | 1.024972287 | 0.007282122 |
| A2A7H1;Z4YN00;Q9QZN4;A2A7G9;A2A7H3                                        | F-box only protein 6                                                                          | Fbxo6         | 1.02492174  | 0.0073559   |
| O70591;F8WJ30                                                             | Prefoldin subunit 2                                                                           | Pfdn2         | 1.024867631 | 0.007446067 |
| Q8BUU7;Q68FH4                                                             | N-acetylgalactosamine kinase                                                                  | Galk2         | 1.024821782 | 0.007586956 |

|                                                                                     |                                                                                                                               |                   |             |             |
|-------------------------------------------------------------------------------------|-------------------------------------------------------------------------------------------------------------------------------|-------------------|-------------|-------------|
| F6RK81;F6UIS1;Q9CQE7                                                                | Endoplasmic reticulum-Golgi intermediate compartment protein 3                                                                | Ergic3            | 1.024739763 | 0.007814898 |
| E9Q589;A0A0A6YY47;A0A0A6YY91;P13595;A0A0A6YWU2;E9QB01                               | Neural cell adhesion molecule 1                                                                                               | Ncam1             | 1.024463811 | 0.008736197 |
| P02104                                                                              | Hemoglobin subunit epsilon-Y2                                                                                                 | Hbb-y             | 1.024461596 | 0.008736197 |
| Q9D1C8                                                                              | Vacuolar protein sorting-associated protein 28 homolog                                                                        | Vps28             | 1.024337442 | 0.009249222 |
| Q5PPR2;Q6P1Y9;Q8R3S6                                                                | Exocyst complex component 1                                                                                                   | Exoc1             | 1.02411355  | 0.010094112 |
| A0A075B5P4;A0A0A6YWR2;P01868;P01869                                                 | Ig gamma-1 chain C region secreted form;Ig gamma-1 chain C region, membrane-bound form                                        | Ighg1             | 1.02397264  | 0.010795927 |
| A0A0U1RPI8;Q9BCZ4;A0A0U1RP62                                                        | Selenoprotein S                                                                                                               | Vimp              | 1.023857256 | 0.011338285 |
| Q3TDD9                                                                              | Protein phosphatase 1 regulatory subunit 21                                                                                   | Ppp1r21           | 1.023789984 | 0.011619209 |
| P61294;A0A1L1SRS6                                                                   | Ras-related protein Rab-6B                                                                                                    | Rab6b             | 1.023528353 | 0.013197352 |
| G3UZG8;G3UX07;G3UZH2;G3UY43;G3UX63                                                  | DNA (cytosine-5)-methyltransferase 3A                                                                                         | Dnmt3a            | 1.023441494 | 0.013719669 |
| Q80YX1;Q80YX0                                                                       | Tenascin                                                                                                                      | Tnc               | 1.023336749 | 0.014253321 |
| Q64726                                                                              | Zinc-alpha-2-glycoprotein                                                                                                     | Azgp1             | 1.023197888 | 0.015061134 |
| Q3TBA3;P21958;F6QHF1                                                                | Antigen peptide transporter 1                                                                                                 | Tap1              | 1.023152943 | 0.015329742 |
| Q3TCH7;E9PXT5;F6UV36                                                                | Cullin-4A                                                                                                                     | Cul4a             | 1.023095548 | 0.01561724  |
| P28665                                                                              | Murinoglobulin-1                                                                                                              | Mug1              | 1.02294254  | 0.016402317 |
| G3UZM9;Q8BWW9;G3UXH4;G3UYD6                                                         | Serine/threonine-protein kinase N2                                                                                            | Pkn2              | 1.022708829 | 0.017913915 |
| Q3U0B3                                                                              | Dehydrogenase/reductase SDR family member 11                                                                                  | Dhrs11            | 1.02249921  | 0.019280871 |
| P16332                                                                              | Methylmalonyl-CoA mutase, mitochondrial                                                                                       | Mut               | 1.022495967 | 0.019280871 |
| Q9R0H0;A2A848                                                                       | Peroxisomal acyl-coenzyme A oxidase 1                                                                                         | Acox1             | 1.022373286 | 0.020372717 |
| Q3U5Q7                                                                              | UMP-CMP kinase 2, mitochondrial                                                                                               | Cmpk2             | 1.021933582 | 0.024014269 |
| O54831                                                                              | Prolactin-7A2                                                                                                                 | Prl7a2            | 1.021900979 | 0.024114221 |
| E9Q3M0;Q62432;E9Q5P9;E9PXA8;A2CG44;Q8BUN5;Q9JIW5;A2CG45;F7BUP2;Q8C3Y6;P97454;P70340 | Mothers against decapentaplegic homolog 2;Mothers against decapentaplegic homolog 3;Mothers against decapentaplegic homolog 9 | Smad2;Smad3;Smad9 | 1.021807198 | 0.025009363 |

|                                        |                                                                    |         |             |             |
|----------------------------------------|--------------------------------------------------------------------|---------|-------------|-------------|
| Q19LI2                                 | Alpha-1B-glycoprotein                                              | A1bg    | 1.021693655 | 0.026280084 |
| Q8BVU5;A2AH28;A2AH27                   | ADP-ribose pyrophosphatase, mitochondrial                          | Nudt9   | 1.021534843 | 0.028196265 |
| B2RSU6;Q6AW69;D3Z3H4                   | Cingulin-like protein 1                                            | Cgnl1   | 1.021507425 | 0.028220274 |
| Q9R112;F6ZKZ3;H3BLH2                   | Sulfide:quinone oxidoreductase, mitochondrial                      | Sqrdl   | 1.0213283   | 0.030104788 |
| E9Q6J4                                 |                                                                    | Ceacam3 | 1.021244144 | 0.030948791 |
| P62309                                 | Small nuclear ribonucleoprotein G                                  | Snrpg   | 1.021137689 | 0.032264266 |
| P09813                                 | Apolipoprotein A-II;Proapolipoprotein A-II                         | Apoa2   | 1.021063994 | 0.033251956 |
| E9QNR6;Q8VD62                          | UPF0696 protein C11orf68 homolog                                   | s03     | 1.020823755 | 0.036971208 |
| Q3UGS4                                 | Protein FAM195B                                                    | Fam195b | 1.020750419 | 0.038082138 |
| Q91XF0;A2A6E7                          | Pyridoxine-5-phosphate oxidase                                     | Pnpo    | 1.020654018 | 0.039634065 |
| Q9Z247                                 | Peptidyl-prolyl cis-trans isomerase FKBP9                          | Fkbp9   | 1.020594439 | 0.040564963 |
| A2AQ07;CON__ENSEMBL:ENSBTAP00000025008 | Tubulin beta-1 chain                                               | Tubb1   | 1.020291258 | 0.045145501 |
| E9Q8N1;E9Q8K5;A2ASS6;A2AT70;F7CR78     | Titin                                                              | Ttn     | 1.020204658 | 0.046586109 |
| P46737;A3KGA8                          | Lys-63-specific deubiquitinase BRCC36                              | Brcc3   | 1.020161676 | 0.047149984 |
| P04444;P04443                          | Hemoglobin subunit beta-H1                                         | Hbb-bh1 | 1.020139196 | 0.047455531 |
| AOA0G2JER6;F8VQE9;Q8VHH5               | Arf-GAP with GTPase, ANK repeat and PH domain-containing protein 3 | Agap3   | 1.020096756 | 0.048186278 |
| Q60994;E9PWU4                          | Adiponectin                                                        | Adipoq  | 1.020037156 | 0.049298722 |
| D3Z0T5;Q8BQ47                          | Protein canopy homolog 4                                           | Cnpy4   | 0.980164283 | 0.04690464  |
| E9Q1D5;Q62219                          | Transforming growth factor beta-1-induced transcript 1 protein     | Tgfb1i1 | 0.980115326 | 0.046180308 |
| Q9Z2D6                                 | Methyl-CpG-binding protein 2                                       | Mecp2   | 0.979985468 | 0.043809052 |
| Q9DBC3;G3UZ59;E0CXC2                   | Cap-specific mRNA (nucleoside-2-O-)-methyltransferase 1            | Cmtr1   | 0.979953862 | 0.043462192 |
| P97742                                 | Carnitine O-palmitoyltransferase 1, liver isoform                  | Cpt1a   | 0.979922252 | 0.042980986 |
| A0A087WRH2;Q9WUD8;D3Z3C1               | Fas apoptotic inhibitory molecule 1                                | Faim    | 0.979896529 | 0.042621724 |
| Q91VH6                                 | Protein MEMO1                                                      | Memo1   | 0.979892045 | 0.042621724 |



|                                                         |                                                             |              |             |             |
|---------------------------------------------------------|-------------------------------------------------------------|--------------|-------------|-------------|
| A0A0U1RP47;A0A0U1RQ85;P22682;A0A0X1KG61                 | E3 ubiquitin-protein ligase CBL                             | Cbl          | 0.979794377 | 0.040928826 |
| Q9QUR7;Q3ULQ2                                           | Peptidyl-prolyl cis-trans isomerase NIMA-interacting 1      | Pin1;Pin1rt1 | 0.979226292 | 0.032074655 |
| A2AWA9;A2AWA7;A2AWB0                                    | Rab GTPase-activating protein 1                             | Rabgap1      | 0.97914004  | 0.030948791 |
| Q9DBR0                                                  | A-kinase anchor protein 8                                   | Akap8        | 0.97913283  | 0.030948791 |
| Q99NB1                                                  | Acetyl-coenzyme A synthetase 2-like, mitochondrial          | Acss1        | 0.978986155 | 0.029107083 |
| Q8VHL1                                                  | Histone-lysine N-methyltransferase SETD7                    | Setd7        | 0.978925168 | 0.028365239 |
| P11031                                                  | Activated RNA polymerase II transcriptional coactivator p15 | Sub1         | 0.978914949 | 0.028332698 |
| P32883                                                  | GTPase KRas;GTPase KRas, N-terminally processed             | Kras         | 0.978898895 | 0.028220274 |
| Q9CQ22;A0A0A6YX02                                       | Ragulator complex protein LAMTOR1                           | Lamtor1      | 0.978893956 | 0.028220274 |
| Q9Z1T2;A0A1D5RMB8;CON__ENSEMBL:ENSBTAP0000006074;Q9R0G6 | Thrombospondin-4;Cartilage oligomeric matrix protein        | Thbs4;Comp   | 0.978873327 | 0.028196265 |
| P32233                                                  | Developmentally-regulated GTP-binding protein 1             | Drg1         | 0.978579693 | 0.024800368 |
| E9PWQ3;J3QQ16;A0A087WS16;D3YWD1                         |                                                             | Col6a3       | 0.978498473 | 0.024014269 |
| Q6NZR5;G3UYT1                                           |                                                             | Skiv2l       | 0.978490985 | 0.024014269 |
| Q9CQN1                                                  | Heat shock protein 75 kDa, mitochondrial                    | Trap1        | 0.97841144  | 0.023277853 |
| Q920E5;A0A0G2JEA5;A0A0G2JDJ5;A0A0G2JEB3;A0A0G2JE82      | Farnesyl pyrophosphate synthase                             | Fdps         | 0.978390436 | 0.023129317 |
| O08759;A0A0J9YUY4;A0A0J9YVG1;A0A0J9YUK0                 | Ubiquitin-protein ligase E3A                                | Ube3a        | 0.978367203 | 0.022956412 |
| Q9QYE6;A0A1Y7VMD3                                       | Golgin subfamily A member 5                                 | Golga5       | 0.978309663 | 0.022398465 |
| P41233;E9Q6G4;Q91V24                                    | ATP-binding cassette sub-family A member 1                  | Abca1        | 0.978183692 | 0.021203509 |
| D3Z7S0;D3Z4J5;Q9D1H7                                    | Golgi to ER traffic protein 4 homolog                       | Get4         | 0.978156801 | 0.02109289  |
| Q9CZR8;Q9CX33                                           | Elongation factor Ts, mitochondrial                         | Tsfm         | 0.978129938 | 0.020896835 |
| A2AAN0;O35250;A2AAN3                                    | Exocyst complex component 7                                 | Exoc7        | 0.978109247 | 0.020767044 |
| Q9DAR7;Q3TBW9;D6RFQ0                                    | m7GpppX diphosphatase                                       | Dcps         | 0.977923082 | 0.019225315 |
| Q80V42                                                  | Carboxypeptidase M                                          | Cpm          | 0.977910337 | 0.019183096 |

|                                               |                                                                        |           |             |             |
|-----------------------------------------------|------------------------------------------------------------------------|-----------|-------------|-------------|
| CON__P04264                                   |                                                                        |           | 0.977884994 | 0.019019253 |
| F8WH23;E9Q5D9;Q61581                          | Insulin-like growth factor-binding protein 7                           | Igfbp7    | 0.977881668 | 0.019019253 |
| A0A1Y7VKN7;A0A1Y7VL28;Q80XC2                  | tRNA (adenine(58)-N(1))-methyltransferase catalytic subunit TRMT61A    | Trmt61a   | 0.977782237 | 0.018206745 |
| E9Q6Q8;E0CX53;Q8BYJ6;H7BX82;F6SUV7            | TBC1 domain family member 4                                            | Tbc1d4    | 0.977730393 | 0.017886172 |
| P97470;A0A0U1RPR5                             | Serine/threonine-protein phosphatase 4 catalytic subunit               | Ppp4c     | 0.977712727 | 0.017803153 |
| Q922F4                                        | Tubulin beta-6 chain                                                   | Tubb6     | 0.977575739 | 0.016668829 |
| P58742                                        | Aladin                                                                 | Aaas      | 0.977568604 | 0.016668829 |
| Q80VP1                                        | Epsin-1                                                                | Epn1      | 0.977548308 | 0.016581379 |
| Q6PAV2                                        | Probable E3 ubiquitin-protein ligase HERC4                             | Herc4     | 0.977461004 | 0.015993763 |
| Q3U0I9;Q8CFD4;A0A0G2JDJ6;A0A0G2JEQ9           | Sorting nexin-8                                                        | Snx8      | 0.977441271 | 0.015902846 |
| P82198;Q3UXJ2                                 | Transforming growth factor-beta-induced protein ig-h3                  | Tgfbf     | 0.977401114 | 0.015646397 |
| Q4PZA2                                        | Endothelin-converting enzyme 1                                         | Ece1      | 0.977388757 | 0.015617265 |
| Q923T9;A0A286YCW8;A0A286YCH4                  | Calcium/calmodulin-dependent protein kinase type II subunit gamma      | Camk2g    | 0.97737996  | 0.01561724  |
| Q5JC28;H3BK65;P42567;F6W2Q5;A0A0R4J0A0;H3BJB8 | Epidermal growth factor receptor substrate 15                          | Eps15     | 0.977326503 | 0.015330174 |
| Q920I9                                        | WD repeat-containing protein 7                                         | Wdr7      | 0.977256144 | 0.014986662 |
| Q9D566;P49891                                 | Sulfotransferase;Estrogen sulfotransferase, testis isoform             | Sult1e1   | 0.977192732 | 0.014567385 |
| Q6PGL7;A0A0N4SUJ0;A0A0N4SV74                  | WASH complex subunit FAM21                                             | Fam21     | 0.977113653 | 0.014109886 |
| Q8BMT0                                        |                                                                        | Serpib9d  | 0.977103112 | 0.014099018 |
| Q00519;G3X982;Q3TYQ9                          | Xanthine dehydrogenase/oxidase;Xanthine dehydrogenase;Xanthine oxidase | Xdh       | 0.976660626 | 0.011376085 |
| O08738                                        | Caspase-6;Caspase-6 subunit p18;Caspase-6 subunit p11                  | Casp6     | 0.976611161 | 0.011188415 |
| Q02788;D3Z7D5                                 | Collagen alpha-2(VI) chain                                             | Col6a2    | 0.976350071 | 0.009870522 |
| A2AFQ0;Q7TMY8;F6XP90;F6UYC1                   | E3 ubiquitin-protein ligase HUWE1                                      | Huwe1     | 0.976311555 | 0.009715737 |
| Q9D7H3;D6RD00;D6REI7;D3Z263                   | RNA 3-terminal phosphate cyclase                                       | RtcA;Rtca | 0.976273196 | 0.009564129 |
| A0A0R4J0I1                                    |                                                                        |           | 0.976270572 | 0.009564129 |

|                                            |                                                                      |         |             |             |
|--------------------------------------------|----------------------------------------------------------------------|---------|-------------|-------------|
| Q9CWQ8;Q8CAB8                              | GATS-like protein 3                                                  | Gatsl3  | 0.976007641 | 0.008535361 |
| Q9D1M7                                     | Peptidyl-prolyl cis-trans isomerase FKBP11                           | Fkbp11  | 0.976004548 | 0.008535361 |
| Q9CQW5                                     | Galectin-2                                                           | Lgals2  | 0.975919716 | 0.008219379 |
| Q9CQ10;A0A0N4SVS3;A0A0N4SUX9               | Charged multivesicular body protein 3                                | Chmp3   | 0.975852667 | 0.007963952 |
| A2AA71;Q3U2P1;A2AA72                       | Protein transport protein Sec24A                                     | Sec24a  | 0.975808743 | 0.007814898 |
| P50285;Q3UNX7;D3Z0T2;A0A0A6YVP9;Q8C9C1     | Dimethylaniline monooxygenase [N-oxide-forming] 1                    | Fmo1    | 0.975776686 | 0.007760171 |
| Q99JY8                                     | Lipid phosphate phosphohydrolase 3                                   | Ppap2b  | 0.97567569  | 0.007446067 |
| D5MCW4;Q9CQ89                              | Protein CutA                                                         | Cuta    | 0.975656884 | 0.007421762 |
| Q8BWM0                                     | Prostaglandin E synthase 2;Prostaglandin E synthase 2 truncated form | Ptges2  | 0.975620782 | 0.007355105 |
| Q91WK1                                     | SPRY domain-containing protein 4                                     | Spryd4  | 0.9755954   | 0.007292521 |
| Q8BH69                                     | Selenide, water dikinase 1                                           | Sephs1  | 0.975463772 | 0.006853517 |
| A6H5Z3                                     | Exocyst complex component 6B                                         | Exoc6b  | 0.975194282 | 0.006027715 |
| Q6S9I0;Q6S9I3                              |                                                                      | Kng2    | 0.975093248 | 0.005726376 |
| Q9Z160;Q810S7;F6QQB5;A2A6N9;F6RK91;F6V3F1  | Conserved oligomeric Golgi complex subunit 1                         | Cog1    | 0.975060341 | 0.005653378 |
| Q91W97                                     | Putative hexokinase HKDC1                                            | Hkdc1   | 0.975058423 | 0.005653378 |
| Q91W96;D6RDT6                              | Anaphase-promoting complex subunit 4                                 | Anapc4  | 0.975028965 | 0.005619076 |
| O88986;E9PWY6                              | 2-amino-3-ketobutyrate coenzyme A ligase, mitochondrial              | Gcat    | 0.974752304 | 0.004856491 |
| A0A087WRE5;Q6P3D0;A0A087WSB5;E9Q9G1;Q8VHN8 | U8 snoRNA-decapping enzyme                                           | Nudt16  | 0.974381808 | 0.004017765 |
| D3YXQ6                                     |                                                                      | Psg16   | 0.97428743  | 0.003826487 |
| Q99MR3                                     | Solute carrier family 12 member 9                                    | Slc12a9 | 0.974239815 | 0.003744672 |
| Q3V493;Q9ES56                              | Trafficking protein particle complex subunit 4                       | Trappc4 | 0.97403545  | 0.00336369  |
| Q9JJK1;A0A0A6YXG0;A0A0A6YW23               | Syntaxin-6                                                           | Stx6    | 0.974021313 | 0.00335682  |
| Q80SX7;Q8BXL7;V9GX20;E9PZK7                | ADP-ribosylation factor-related protein 1                            | Arfrp1  | 0.973632262 | 0.002699837 |

|                                                                       |                                                                             |          |             |             |
|-----------------------------------------------------------------------|-----------------------------------------------------------------------------|----------|-------------|-------------|
| A0A0R3P9C8;Q9DC69                                                     | NADH dehydrogenase [ubiquinone] 1 alpha subcomplex subunit 9, mitochondrial | Ndufa9   | 0.973581479 | 0.002636    |
| E9QAU4;A2AQ25;D3Z781;Q8BHR1;B1AY50;B1AY49                             | Sickle tail protein                                                         | Etl4;Skt | 0.973402403 | 0.002398441 |
| Q9JK53                                                                | Prolargin                                                                   | Prelp    | 0.973255859 | 0.002209977 |
| Q8C142                                                                | Low density lipoprotein receptor adapter protein 1                          | Ldlrap1  | 0.972786772 | 0.001671403 |
| Q3UIL6;A0A1L1SQ79;S4R243                                              | Pleckstrin homology domain-containing family A member 7                     | Plekha7  | 0.972447556 | 0.001373369 |
| Q8VCM3;A0A1Y7VLE1;A0A1Y7VNH4;A0A1Y7VJT0                               | Zinc finger FYVE domain-containing protein 21                               | Zfyve21  | 0.972424664 | 0.001363042 |
| Q9Z2A7;F6V8W6                                                         | Diacylglycerol O-acyltransferase 1                                          | Dgat1    | 0.971944437 | 0.001022259 |
| Q3TCU5;Q9R233;G3UZZ2                                                  | Tapasin                                                                     | Tapbp    | 0.971932947 | 0.001021809 |
| Q9JJE7                                                                | Fatty acid desaturase 3                                                     | Fads3    | 0.971744842 | 0.000919424 |
| Q63810                                                                | Calcineurin subunit B type 1                                                | Ppp3r1   | 0.971687403 | 0.000892577 |
| E9QQ99;D3Z1Y1;A0A0R4J1R1;Q9DBY1;D3YZH4                                | E3 ubiquitin-protein ligase synoviolin                                      | Syvn1    | 0.971593136 | 0.000846327 |
| Q3TAW3;E9Q296;Q8C178;Q9EPL9;A0A0J9YVH1;D3Z2N6                         | Acyl-coenzyme A oxidase;Peroxisomal acyl-coenzyme A oxidase 3               | Acox3    | 0.971572073 | 0.000840915 |
| P70227;P11881                                                         | Inositol 1,4,5-trisphosphate receptor type 3                                | Itpr3    | 0.97142875  | 0.000772486 |
| Q9D6A7;I7HJI5;J3JSA2                                                  |                                                                             | Serpib9c | 0.971102579 | 0.000643939 |
| Q6P2B1;F6TDZ2;E9Q0H8;A0A0U1RQ41;Q8K368                                | Transportin-3                                                               | Tnpo3    | 0.971021306 | 0.000619857 |
| Q80UG2;P70207                                                         | Plexin-A4                                                                   | Plxna4   | 0.971012757 | 0.000619857 |
| D3Z041;P41216;D3Z457;D3YVF6;F6WNZ2                                    | Long-chain-fatty-acid--CoA ligase 1                                         | Acsl1    | 0.970982575 | 0.000613544 |
| Q3TCD4;Q9WUR2;E9Q7A8;E9PYC6;E9Q858;E9PUY9;E9PYA9;E9PVM6;E9PY42;Q78JN3 | Enoyl-CoA delta isomerase 2, mitochondrial                                  | Eci2     | 0.970825502 | 0.000557815 |
| A0A0G2JGD2;P07091                                                     | Protein S100-A4                                                             | S100a4   | 0.970791922 | 0.000549846 |
| Q8C147                                                                | Dedicator of cytokinesis protein 8                                          | Dock8    | 0.970684012 | 0.000520148 |
| Q9DBG7;F6VF36                                                         | Signal recognition particle receptor subunit alpha                          | Srpr     | 0.9706782   | 0.000520148 |

|                                    |                                                                                                                                     |                   |             |             |
|------------------------------------|-------------------------------------------------------------------------------------------------------------------------------------|-------------------|-------------|-------------|
| Q06138;Q9DB16                      | Calcium-binding protein 39                                                                                                          | Cab39             | 0.970625495 | 0.000508385 |
| P70663                             | SPARC-like protein 1                                                                                                                | Sparcl1           | 0.97057715  | 0.000496331 |
| Q81157                             | Upstream-binding protein 1                                                                                                          | Ubp1              | 0.97038049  | 0.000439102 |
| F8WGI9;Q91YY0;P98156;F8WIN7        | Very low-density lipoprotein receptor                                                                                               | Vldlr             | 0.970323525 | 0.000429672 |
| Q5SRX1;Q5SXA5;Q5SXA4               | TOM1-like protein 2                                                                                                                 | Tom1l2            | 0.970219408 | 0.000404105 |
| O35114                             | Lysosome membrane protein 2                                                                                                         | Scarb2            | 0.970035607 | 0.000360169 |
| Q8R5A6;Q80VE5                      | TBC1 domain family member 22A                                                                                                       | Tbc1d22a;Tbc1d22b | 0.969894384 | 0.000332976 |
| Q61176                             | Arginase-1                                                                                                                          | Arg1              | 0.969586868 | 0.000277215 |
| Q9QZ82;A0A087WRU6                  | Cholesterol side-chain cleavage enzyme, mitochondrial                                                                               | Cyp11a1           | 0.969483718 | 0.000262898 |
| Q91XC9                             | Peroxisomal membrane protein PEX16                                                                                                  | Pex16             | 0.969293536 | 0.000232742 |
| A2AJY7;A2AJY5;A2AJY2;O35206        | Collagen alpha-1(XV) chain;Restin                                                                                                   | Col15a1           | 0.969177414 | 0.00021674  |
| Q62384;F8WHU9                      | Zinc finger protein ZPR1                                                                                                            | Zpr1              | 0.969143882 | 0.000214386 |
| Q04207;A4QPD3;P15307               | Transcription factor p65;Proto-oncogene c-Rel                                                                                       | Rela;Rel          | 0.968349296 | 0.00012702  |
| Q9DAU1;B0V2V1                      | Protein canopy homolog 3                                                                                                            | Cnpy3             | 0.968263579 | 0.000120649 |
| Q9EQ09;E0CXW6                      | Oxidized low-density lipoprotein receptor 1;Oxidized low-density lipoprotein receptor 1, soluble form                               | Olr1              | 0.967731348 | 8.31E-05    |
| E9Q5B2;G5E8X1;Q9DCS2;D3YZM4;E9Q7K5 | UPF0585 protein C16orf13 homolog                                                                                                    | O610011F06Rik     | 0.967714621 | 8.31E-05    |
| F6Z4F8;A2A7F7;Q9WU20;A2A7F9        | Methylenetetrahydrofolate reductase                                                                                                 | Mthfr             | 0.967686084 | 8.29E-05    |
| Q8JZV7;F6UP77;F7CUP3               | Putative N-acetylglucosamine-6-phosphate deacetylase                                                                                | Amdhd2            | 0.967500006 | 7.38E-05    |
| A0A087WS27;D3Z5S8                  |                                                                                                                                     | Fam46a            | 0.967334206 | 6.68E-05    |
| D3Z383;Q07646                      | Mesoderm-specific transcript protein                                                                                                | Mest              | 0.967279923 | 6.53E-05    |
| Q8BW75;E9Q3X6;E9PVL9               | Amine oxidase [flavin-containing] B                                                                                                 | Maob              | 0.967251587 | 6.48E-05    |
| A0A0G2JFM9;E9PUK3;E9PUI5;Q8K012    | Formin-binding protein 1-like                                                                                                       | Fnbp1l            | 0.967069737 | 5.73E-05    |
| F7C386;F6TVX7;Q8BSF4;E9PX91;D3YY63 | Phosphatidylserine decarboxylase proenzyme;Phosphatidylserine decarboxylase alpha chain;Phosphatidylserine decarboxylase beta chain | Pisd;Gm20671      | 0.966837483 | 4.93E-05    |

|                                                                                                                  |                                                    |             |             |          |
|------------------------------------------------------------------------------------------------------------------|----------------------------------------------------|-------------|-------------|----------|
| O88531;B1B0P8;B1B0P9                                                                                             | Palmitoyl-protein thioesterase 1                   | Ppt1        | 0.966537348 | 4.13E-05 |
| O35551;Q3U983;J3QJV7                                                                                             | Rab GTPase-binding effector protein 1              | Rabep1      | 0.966261188 | 3.47E-05 |
| A2A5N7;D3Z6V6;Q8BTJ4                                                                                             | Bis(5-adenosyl)-triphosphatase enpp4               | Enpp7;Enpp4 | 0.965998587 | 2.88E-05 |
| Q64449;A2AAA9                                                                                                    | C-type mannose receptor 2                          | Mrc2        | 0.965090245 | 1.46E-05 |
| Q9WUR9;A2ARF6;F6TEU8                                                                                             | Adenylate kinase 4, mitochondrial                  | Ak4         | 0.965017586 | 1.40E-05 |
| Q3U125;Q9CYH2;D3Z0A8;D3YYG8;D3Z398;<br>D3Z252;D3Z143;D3YWL4                                                      | Redox-regulatory protein FAM213A                   | Fam213a     | 0.965001338 | 1.40E-05 |
| A0A0R4J1G5;Q91X78                                                                                                | Erlin-1                                            | Erlin1      | 0.9646569   | 1.08E-05 |
| Q99LT0                                                                                                           | Protein dpy-30 homolog                             | Dpy30       | 0.964557032 | 1.01E-05 |
| Q5SUF2;F8WGA8                                                                                                    | Luc7-like protein 3                                | Luc7l3      | 0.963981493 | 6.56E-06 |
| F8WHG5;Q60823                                                                                                    | RAC-beta serine/threonine-protein kinase           | Akt2        | 0.96384603  | 6.04E-06 |
| A0A1L1SRW7;A0A1L1SS90;A0A0R4J050;Q9<br>9JW2;A0A1L1SRC1;A0A1L1SRL5;A0A087W<br>PX1;A0A087WRE0;A0A1L1SSU4           | Aminoacylase-1                                     | Acy1        | 0.963375697 | 4.35E-06 |
| F8WJI3;Q8R3Q6;E9Q4B5                                                                                             | Coiled-coil domain-containing protein 58           | Ccdc58      | 0.963040439 | 3.35E-06 |
| Q3V0K9;D3Z6J7                                                                                                    | Plastin-1                                          | Pls1        | 0.962889946 | 3.05E-06 |
| Q8VCR7;A0A087WPF8;A0A087WSR2;E9QN<br>99;A0A087WP24;A0A087WRJ2;A0A1L1SRH<br>5;A0A1L1SUX1                          | Alpha/beta hydrolase domain-containing protein 14B | Abhd14b     | 0.9625471   | 2.33E-06 |
| Q9DAZ2;Q5SXX2                                                                                                    | Prolactin-2B1                                      | Prl2b1      | 0.961754624 | 1.21E-06 |
| A0A0X1KG62;Q8C4Y3;F6UFF7;F6SWS9                                                                                  | Negative elongation factor B                       | Nelfb       | 0.961522814 | 1.01E-06 |
| E9QKZ2;Q91YE6;E0CXB2;F6TLX3;E0CY46;F6<br>UT58                                                                    | Importin-9                                         | Ipo9        | 0.961365749 | 8.92E-07 |
| J3QNK8;Q8CBW3;A0A087WP64;A0A087W<br>PE6;A0A087WNT3;A0A087WNU9;A0A087<br>WRS3;A0A087WPP8;Q6AXH6;Q6AXD2;P62<br>484 | Abl interactor 1                                   | Abi1        | 0.961324888 | 8.75E-07 |
| Q9ER81                                                                                                           | Torsin-1A-interacting protein 2, isoform IFRG15    | Tor1aip2    | 0.961281079 | 8.57E-07 |
| P47857                                                                                                           | ATP-dependent 6-phosphofructokinase, muscle type   | Pfkm        | 0.961176101 | 7.95E-07 |

|                                     |                                                                                                                                         |          |             |          |
|-------------------------------------|-----------------------------------------------------------------------------------------------------------------------------------------|----------|-------------|----------|
| Q6PB93                              | Polypeptide N-acetylgalactosaminyltransferase 2;Polypeptide N-acetylgalactosaminyltransferase 2 soluble form                            | Galnt2   | 0.961165845 | 7.95E-07 |
| F6Q3K8;Q924M7                       | Mannose-6-phosphate isomerase                                                                                                           | Mpi      | 0.960830666 | 6.09E-07 |
| Q62056                              |                                                                                                                                         | Psg17    | 0.960792703 | 6.00E-07 |
| Q9Z110;D3Z0B4                       | Delta-1-pyrroline-5-carboxylate synthase;Glutamate 5-kinase;Gamma-glutamyl phosphate reductase                                          | Aldh18a1 | 0.960701473 | 5.64E-07 |
| Q3U0V2                              | Tumor necrosis factor receptor type 1-associated DEATH domain protein                                                                   | Tradd    | 0.960515491 | 4.87E-07 |
| Q61805;A2AC65;F6XKX9                | Lipopolysaccharide-binding protein                                                                                                      | Lbp      | 0.959575845 | 2.18E-07 |
| Q80WQ2;A0A1D5RLY2                   | Protein VAC14 homolog                                                                                                                   | Vac14    | 0.959094301 | 1.44E-07 |
| Q9JHW9;G3UWP3;A0A140LIF9;Q62148     | Aldehyde dehydrogenase family 1 member A3                                                                                               | Aldh1a3  | 0.955836375 | 7.30E-09 |
| P51432                              | 1-phosphatidylinositol 4,5-bisphosphate phosphodiesterase beta-3                                                                        | Plcb3    | 0.955614867 | 6.13E-09 |
| Q3UTR7;P11859                       | Angiotensinogen;Angiotensin-1;Angiotensin-2;Angiotensin-3;Angiotensin-4;Angiotensin 1-9;Angiotensin 1-7;Angiotensin 1-5;Angiotensin 1-4 | Agt      | 0.954807666 | 2.93E-09 |
| Q9DBN5;Q8BK80                       | Lon protease homolog 2, peroxisomal                                                                                                     | Lonp2    | 0.954211565 | 1.63E-09 |
| A0A075B6A3;A0A0A6YXW6               |                                                                                                                                         | Igha     | 0.953890214 | 1.20E-09 |
| B7ZC23;B7ZC24;Q91W39                | Nuclear receptor coactivator 5                                                                                                          | Ncoa5    | 0.951375849 | 8.74E-11 |
| Q6P8N8;Q9JHS4;F7BB92                | ATP-dependent Clp protease ATP-binding subunit clpX-like, mitochondrial                                                                 | Clpx     | 0.950775693 | 4.64E-11 |
| D3Z6W7;Q3UHH8                       | Glucoside xylosyltransferase 1                                                                                                          | Gxylt1   | 0.949341752 | 9.54E-12 |
| A0A0R4J0P1;Q9D7B6;D3YTT4;A0A1L1SUG2 | Isobutyryl-CoA dehydrogenase, mitochondrial                                                                                             | Acad8    | 0.949151707 | 7.91E-12 |
| H3BJ30;H3BJW3;Q6NVF9;H3BKW0         | Cleavage and polyadenylation specificity factor subunit 6                                                                               | Cpsf6    | 0.948418032 | 3.49E-12 |
| E9Q6L4;Q60949                       | TBC1 domain family member 1                                                                                                             | Tbc1d1   | 0.948381575 | 3.46E-12 |
| Q61823                              | Programmed cell death protein 4                                                                                                         | Pdcd4    | 0.947810966 | 1.82E-12 |
| E9PZ88;F8WIE1;Q91W89;E9PYM7;F6TFL1  | Alpha-mannosidase 2C1                                                                                                                   | Man2c1   | 0.946474484 | 4.06E-13 |
| Q7M732                              | Retrotransposon-like protein 1                                                                                                          | Rtl1     | 0.946404437 | 3.69E-13 |

|                                                                                         |                                                                                                    |           |             |   |
|-----------------------------------------------------------------------------------------|----------------------------------------------------------------------------------------------------|-----------|-------------|---|
| A0A087WR20;P49935                                                                       | Pro-cathepsin H;Cathepsin H mini chain;Cathepsin H;Cathepsin H heavy chain;Cathepsin H light chain | Ctsh      | 0.943031552 | 0 |
| Q6PKB0;Q61559;A0A1B0GSK0                                                                | IgG receptor FcRn large subunit p51                                                                | Fcgrt     | 0.941745827 | 0 |
| Q9JLN9                                                                                  | Serine/threonine-protein kinase mTOR                                                               | Mtor      | 0.939012815 | 0 |
| Q9Z315                                                                                  | U4/U6.U5 tri-snRNP-associated protein 1                                                            | Sart1     | 0.934059022 | 0 |
| CON__P13645;A2A513;CON__P02535-1;P02535;CON__Q148H6;CON__Q7Z3Y7;CON__Q7Z3Z0;CON__Q7Z3Y8 |                                                                                                    |           | 0.930688563 | 0 |
| Q3U487                                                                                  | E3 ubiquitin-protein ligase HECTD3                                                                 | Hectd3    | 0.927746563 | 0 |
| A2ARV4;A2ARV5                                                                           | Low-density lipoprotein receptor-related protein 2                                                 | Lrp2      | 0.924717577 | 0 |
| Q9D3P8;D3YXU2;D3YY76;D3YV19                                                             | Plasminogen receptor (KT)                                                                          | Plgrkt    | 0.92373798  | 0 |
| O54950;D3YUS1;Q8BIQ9;Q91WG5                                                             | 5-AMP-activated protein kinase subunit gamma-1                                                     | Prkag1    | 0.920449787 | 0 |
| O08601                                                                                  | Microsomal triglyceride transfer protein large subunit                                             | Mttp      | 0.920334783 | 0 |
| P70695                                                                                  | Fructose-1,6-bisphosphatase isozyme 2                                                              | Fbp2      | 0.917260255 | 0 |
| CON__P48668;CON__P04259;CON__P02538;CON__P19013                                         |                                                                                                    |           | 0.910125464 | 0 |
| Q9JLB4                                                                                  | Cubilin                                                                                            | Cubn      | 0.908571976 | 0 |
| Q9CQ40                                                                                  | 39S ribosomal protein L49, mitochondrial                                                           | Mrpl49    | 0.905094094 | 0 |
| Q99JB7                                                                                  | Protein amnionless                                                                                 | Amn       | 0.900314347 | 0 |
| Q60960;G3UXF0                                                                           | Importin subunit alpha-5;Importin subunit alpha-5, N-terminally processed                          | Kpna1     | 0.890951568 | 0 |
| Q05793                                                                                  | Basement membrane-specific heparan sulfate proteoglycan core protein;Endorepellin;LG3 peptide      | Hspg2     | 0.860502184 | 0 |
| O08712                                                                                  | Tumor necrosis factor receptor superfamily member 11B                                              | Tnfrsf11b | 0.852761721 | 0 |



**Table S3. Clinical Characteristics of Human Placentae Donors**

| Maternal age at delivery (yrs) | Tumor stage (AGCC 2107) | Surgery during pregnancy | Chemo during pregnancy | Epirubicin total dose (mg/sqm) | Sex and kindred | Gestational age at delivery (wks) | Baby birth weight (g) |
|--------------------------------|-------------------------|--------------------------|------------------------|--------------------------------|-----------------|-----------------------------------|-----------------------|
| 33                             | IIA                     | Biopsy                   | EC x 6                 | 450                            | M G1            | 40                                | 2690 (SGA)            |
| 37                             | IIA                     | Quad + axilla            | EC x 4                 | 300                            | F G3            | 37                                | 2660 (AGA)            |
| 38                             | IIB                     | Mast + axilla            | EC x 2                 | 150                            | M G1            | 36                                | 3635 (AGA)            |
| 32                             | IIB                     | Biopsy                   | EC x 3                 | 225                            | M G2            | 39                                | 3180 (AGA)            |
| 35                             | IIA                     | Biopsy                   | EC x 4                 | 300                            | F G2            | 38                                | 3070 (AGA)            |
| 41                             | IA                      | Quad + axilla            | wE x 8                 | 280                            | M G1            | 38                                | 2825 (AGA)            |
| 37                             | IIIA                    | Mast + axilla            | EC x 3                 | 225                            | F G2            | 36                                | 2830 (AGA)            |

Abbreviations:

EC: Epirubicin/Cyclophosphamide; wE: weekly Epirubicin; M: male; F: female; G: number of kindred;

SGA: small for gestational age\*; AGA: appropriate for gestational age\*

\*according to Bertino E, Spada E, Occhi L et al. Neonatal anthropometric charts: the Italian neonatal study.

J Pediatr Gastroenterol Nutr 2010;51 (3):353-61.

**Figure S1. Histology of mice placentae**

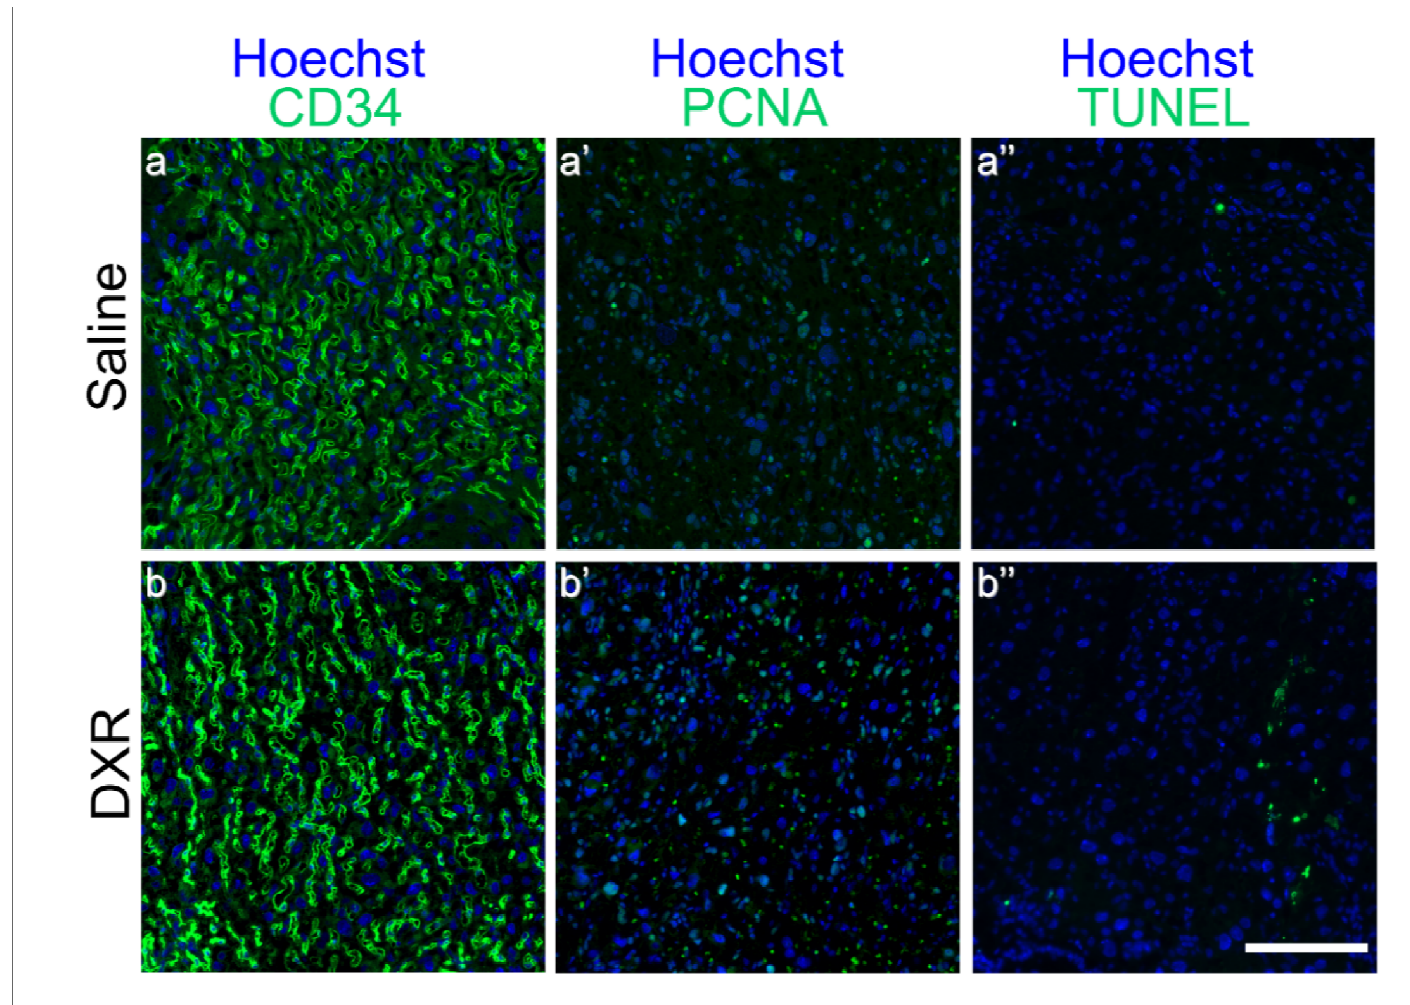

Representative pictures of control- (a-a'') or DXR-exposed (b-b'') mice-placenta, stained for CD34 (neovascularization; a,b), PCNA (proliferation; a',b') or TUNEL (apoptosis; a'',b''). Florescence images were photographed by LSM-510 confocal laser-scanning microscope; offset calibration of the hotomultiplier was performed with sections stained with secondary antibodies only. Bar = 100  $\mu$ m.
